# Supplementary material for: Summer valley-floor snowfall in Taylor Valley, Antarctica from 1995–2017
Source: Copernicus journal article supplement (doi:10.5194/tc-2020-203), 2020-08-28
Supplement: Supplementary file 1 [file Supplemental Tables.pdf › Supplemental Tables.pdf]

Table S1. Values with errors shown in Figure 4. EXEM and BOYM are data from the weighing bucket gauge. FRLM and HOEM are data from the ultrasonic distance ranger. Errors are based on 0.5 mm w.e. error for each snowfall.

| Snow Year | Spring    |            |           |           | Summer    |           |           |           | Fall       |             |           |           |
|-----------|-----------|------------|-----------|-----------|-----------|-----------|-----------|-----------|------------|-------------|-----------|-----------|
|           | EXEM      | FRLM       | HOEM      | BOYM      | EXEM      | FRLM      | HOEM      | BOYM      | EXEM       | FRLM        | HOEM      | BOYM      |
| 1994      |           |            |           |           |           |           |           | 0 ± 0     |            |             |           | 1.4 ± 1   |
| 1995      |           |            |           |           |           |           |           | 0 ± 0     |            |             |           | 0 ± 0     |
| 1996      |           |            |           | 0 ± 0     |           |           |           | 1.1 ± 0.5 |            |             |           | 0 ± 0     |
| 1997      |           |            |           | 1 ± 1     |           |           |           | 0 ± 0     |            |             |           | 4.4 ± 1   |
| 1998      |           |            |           |           |           |           |           | 0 ± 0     |            |             |           | 2.1 ± 1.5 |
| 1999      |           |            |           | 0.7 ± 0.5 |           |           |           | 0 ± 0     | 4.3 ± 1.5  |             |           | 2.5 ± 1   |
| 2000      | 3.7 ± 2.5 |            |           | 2 ± 1.5   | 1.3 ± 1   |           |           | 0 ± 0     | 10.3 ± 5   |             |           | 2.5 ± 1.5 |
| 2001      | 9.6 ± 2   |            |           | 3 ± 1.5   | 0 ± 0     |           |           | 0 ± 0     | 0 ± 0      |             |           | 1.2 ± 1   |
| 2002      | 0 ± 0     |            |           | 4.6 ± 1.5 | 0 ± 0     | 0 ± 0     |           | 2.4 ± 0.5 | 3.3 ± 1.5  | 0 ± 0       |           | 1.8 ± 1   |
| 2003      | 8.7 ± 2.5 | 5.3 ± 3.5  |           | 1.4 ± 0.5 | 5.5 ± 3   | 0.9 ± 1.5 |           | 0 ± 0     | 8.6 ± 3    | 0 ± 0       |           | 0.8 ± 0.5 |
| 2004      | 4.7 ± 1   | 9.3 ± 5.5  |           | 0 ± 0     | 2.7 ± 1   | 0.7 ± 0.5 |           | 2.2 ± 1   | 0 ± 0      | 1 ± 1       |           | 3.4 ± 2   |
| 2005      | 0 ± 0     | 1.5 ± 1.5  |           | 0 ± 0     | 0 ± 0     | 0 ± 0     |           | 0 ± 0     | 0 ± 0      | 13.7 ± 8.5  |           | 8.4 ± 3   |
| 2006      | 0 ± 0     | 0 ± 0      |           | 1.7 ± 1   | 0 ± 0     | 0 ± 0     |           | 0 ± 0     | 8.6 ± 2.5  | 18.8 ± 11.5 | 0 ± 0     | 5.2 ± 1.5 |
| 2007      | 7.1 ± 3   | 21.2 ± 9.5 | 0 ± 0     | 4.9 ± 2   | 2.1 ± 1   | 0 ± 0     | 1.9 ± 1   | 9.4 ± 1   | 2.4 ± 1.5  | 3.8 ± 3.5   | 0 ± 0     | 0 ± 0     |
| 2008      | 4 ± 2     | 1.2 ± 1    | 0 ± 0     | 0 ± 0     | 1.4 ± 1   | 0 ± 0     | 0 ± 0     | 0 ± 0     | 6.4 ± 2    | 8.8 ± 5     | 2 ± 1     | 5 ± 2     |
| 2009      | 9.6 ± 3.5 | 11.8 ± 7   | 1.5 ± 1   | 1 ± 0.5   | 0 ± 0     | 4 ± 1     | 0 ± 0     | 2.8 ± 1   | 0 ± 0      | 1.2 ± 1     | 2.9 ± 2   | 0.6 ± 0.5 |
| 2010      | 0 ± 0     | 5.8 ± 2.5  | 1.4 ± 1   | 1.5 ± 1   | 2.2 ± 1.5 | 0.4 ± 0.5 | 0.5 ± 0.5 |           | 11.5 ± 2.5 | 3.6 ± 1     | 0.9 ± 0.5 |           |
| 2011      | 7.5 ± 4   | 5.2 ± 2.5  | 1.3 ± 0.5 |           | 0 ± 0     | 0 ± 0     | 2.8 ± 1.5 |           | 2.3 ± 1    | 2.7 ± 1.5   |           | 2.4 ± 0.5 |
| 2012      | 5.2 ± 2   | 3.7 ± 3    |           | 2.4 ± 1.5 | 0.6 ± 0.5 | 0 ± 0     | 3.7 ± 1   | 1.8 ± 1   | 4.5 ± 2    | 0.6 ± 0.5   | 3.2 ± 1.5 | 2.1 ± 1   |
| 2013      | 4.4 ± 1   | 1.6 ± 1    | 3.6 ± 1.5 | 4.2 ± 1   | 0 ± 0     | 0 ± 0     | 0 ± 0     |           | 1.4 ± 1    |             | 0.9 ± 0.5 |           |
| 2014      | 4.1 ± 1.5 |            | 1.7 ± 1   |           | 0 ± 0     | 0 ± 0     |           | 0 ± 0     | 0.5 ± 0.5  | 4.1 ± 4.5   | 0.5 ± 0.5 | 0.7 ± 0.5 |
| 2015      | 3.5 ± 1   | 2.7 ± 3    | 1 ± 0.5   | 1.1 ± 0.5 | 0 ± 0     | 0 ± 0     | 0 ± 0     | 0 ± 0     | 3.3 ± 1    | 0 ± 0       | 1.6 ± 1   | 0 ± 0     |
| 2016      | 0.5 ± 0.5 |            | 6.1 ± 3.5 |           | 0 ± 0     | 1.9 ± 1   | 0 ± 0     | 0 ± 0     | 3 ± 1.5    | 0.7 ± 0.5   | 0 ± 0     | 0 ± 0     |
| 2017      | 5.8 ± 1   | 1.2 ± 1    | 0 ± 0     | 3.5 ± 2   | 2.1 ± 0.5 | 0 ± 0     | 1.7 ± 0.5 |           | 2.3 ± 1    | 7.1 ± 8     | 1.2 ± 1   | 1.2 ± 0.5 |

Table S2. Snow accumulation errors from this study. Error based on  $\pm 0.5$  mm w.e. for each daily measurement.

| Calendar<br>Year | EXEM<br>weighing gauge | FRLM<br>ultrasonic | HOEM<br>weighing gauge | HOEM<br>ultrasonic | BOYM<br>weighing gauge | BOYM<br>ultrasonic |
|------------------|------------------------|--------------------|------------------------|--------------------|------------------------|--------------------|
| 1996             |                        |                    |                        |                    | 0.5                    |                    |
| 1997             |                        |                    |                        |                    | 2                      |                    |
| 1998             |                        |                    |                        |                    |                        |                    |
| 1999             |                        |                    |                        |                    | 2                      |                    |
| 2000             | 2.5                    |                    |                        |                    | 3.5                    |                    |
| 2001             | 8.5                    |                    |                        |                    | 3.5                    |                    |
| 2002             |                        |                    |                        |                    | 3                      |                    |
| 2003             | 2                      |                    |                        |                    | 1                      | 1                  |
| 2004             | 8.5                    | 10                 |                        |                    | 3                      |                    |
| 2005             |                        |                    |                        |                    | 3                      |                    |
| 2006             |                        | 17                 |                        |                    | 2.5                    |                    |
| 2007             | 2.5                    | 18                 |                        |                    | 3                      |                    |
| 2008             | 7                      | 13.5               |                        | 1                  | 2                      | 0.5                |
| 2009             | 5.5                    | 9                  |                        | 3.5                | 2                      |                    |
| 2010             |                        | 4                  |                        | 2                  | 1                      |                    |
| 2011             | 4                      | 6                  | 0.5                    | 2                  |                        |                    |
| 2012             | 7                      | 4.5                |                        |                    | 4                      |                    |
| 2013             | 5                      | 1                  | 2                      | 2                  | 1                      |                    |
| 2014             | 2.5                    |                    | 2                      | 1.5                |                        |                    |
| 2015             | 2                      |                    | 0.5                    | 2.5                | 1                      | 0.5                |
| 2016             | 3                      |                    |                        | 3.5                | 0.5                    |                    |
| 2017             | 2                      | 9                  |                        |                    | 3                      |                    |
